# Supplementary material
Source: PubMed Central journal article supplement (PMC5933098)
Supplement: Supplementary_Figure_1_199.pdf [file Supplementary_Figure_1_199.pdf]

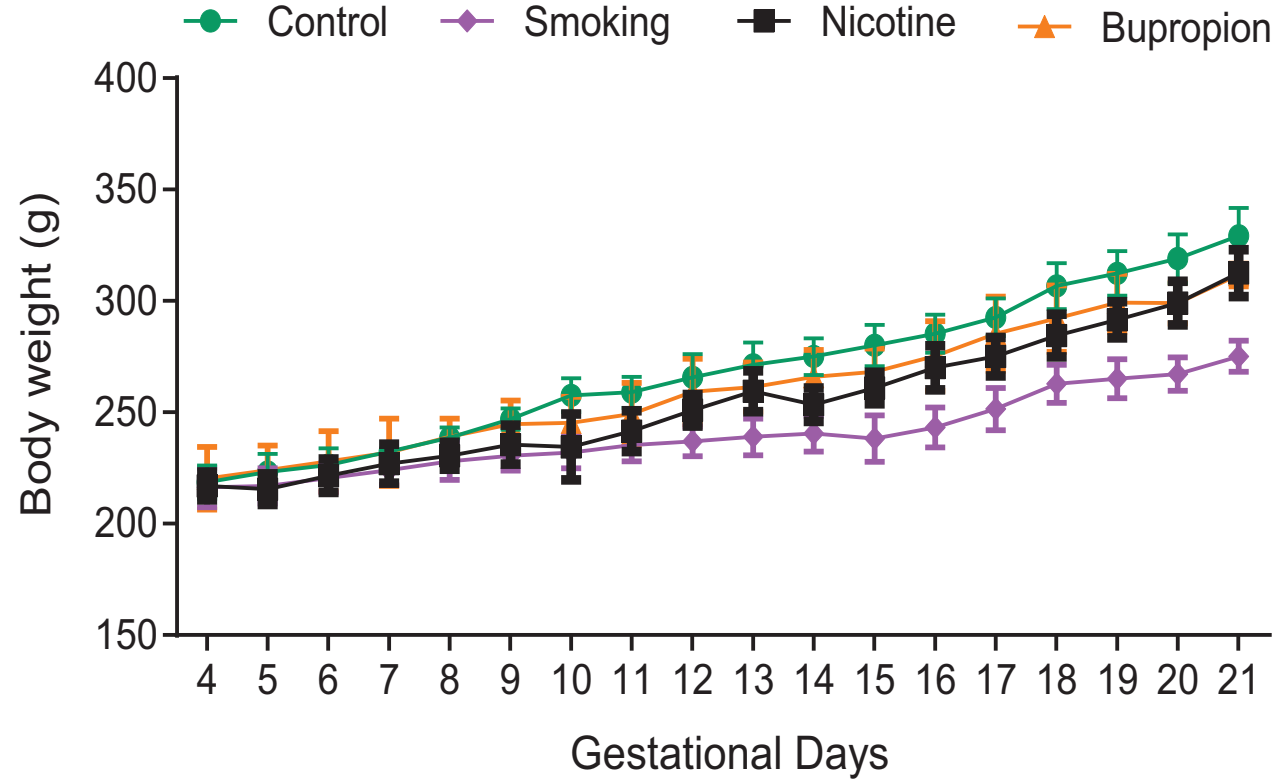

Supplementary figure 1. Maternal body weight over the course of gestation. Body weights was measured daily in control, smoking, nicotine and bupropion dams. Smoking dams gained less weight during later gestation but there is no significant effect in nicotine and bupropion dams compared to controls. Values are given as means  $\pm$  SEM of 6 rats in each group.
