# Supplementary material
Source: PubMed Central journal article supplement (PMC5933098)
Supplement: Supplementary_Figure_2_199.pdf [file Supplementary_Figure_2_199.pdf]

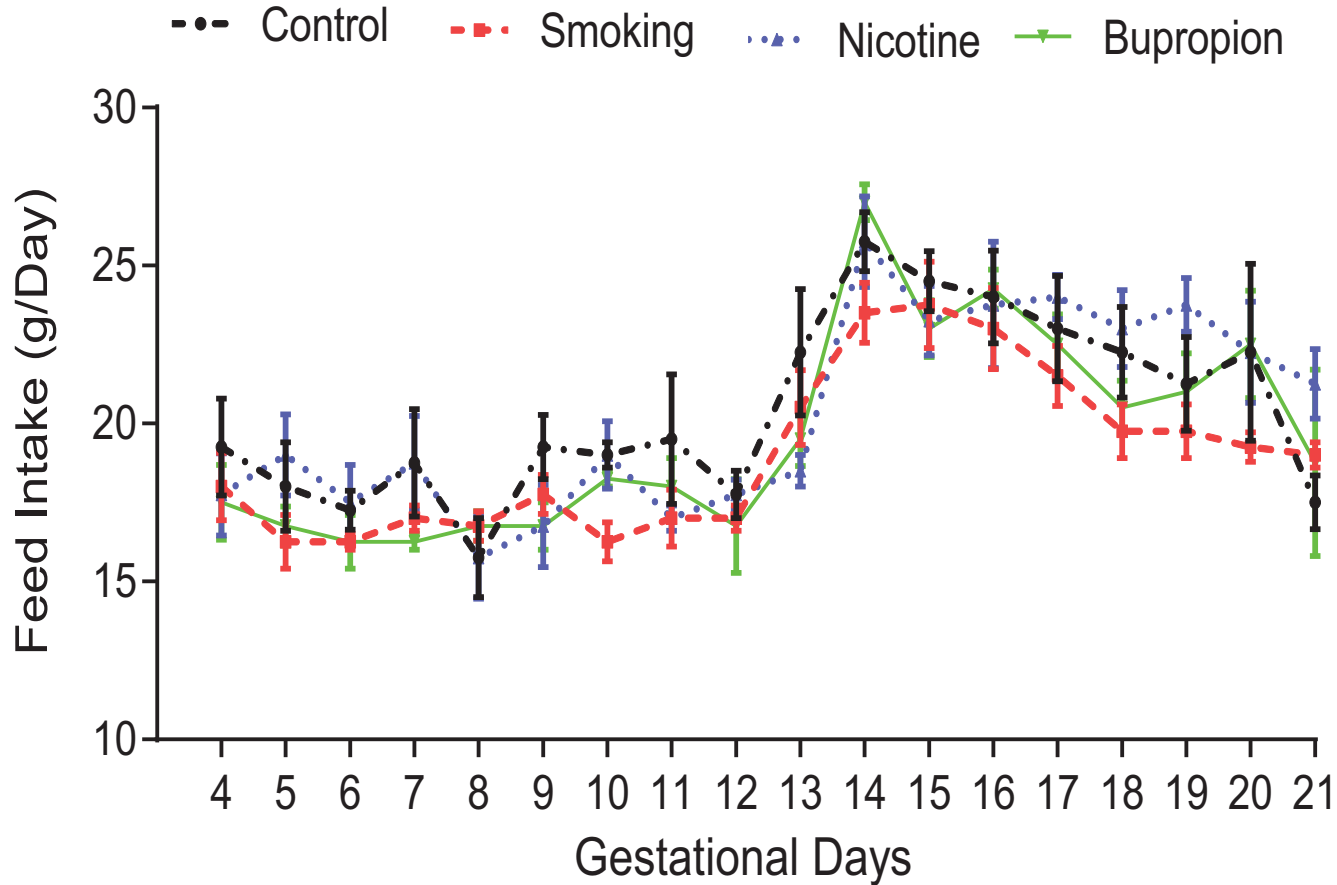

Supplementary figure 2. Feed intake over the course of gestation. Daily feed intake was measured in control, smoking, nicotine and bupropion dams. There was no significant difference in the food intake between groups. Values are given as means  $\pm$  SEM of 6 rats in each group.
